# Supplementary material
Source: publisher figshare collection journal article supplement (https://acs.figshare.com/ndownloader/files/10149225)
Supplement: Supplementary file 1 [file 10149225]

**Silver incorporated mussel-inspired polydopamine coatings on mesoporous silica as an efficient nanocatalyst and antimicrobial agent**

Yiyan Song<sup>1</sup>, Huijun Jiang<sup>2</sup>, Bangbang Wang<sup>3</sup>, Yan Kong<sup>3</sup>, Jin Chen<sup>1,4\*</sup>

<sup>1</sup>School of Public Health, Nanjing Medical University, Nanjing 211166, China

<sup>2</sup>School of Pharmacy, Nanjing Medical University, Nanjing 211166, China

<sup>3</sup>State Key Laboratory of Materials-Oriented Chemical Engineering, College of Chemistry and Chemical Engineering, Nanjing Tech University, 210009 Nanjing, China.

<sup>4</sup>The Key Laboratory of Modern Toxicology, Ministry of Education, School of Public Health, Nanjing Medical University, Nanjing 211166, Jiangsu, China

Correspondence and request for materials should be addressed to J.C. (email: okachen30@gmail.com; jchen@njmu.edu.cn)

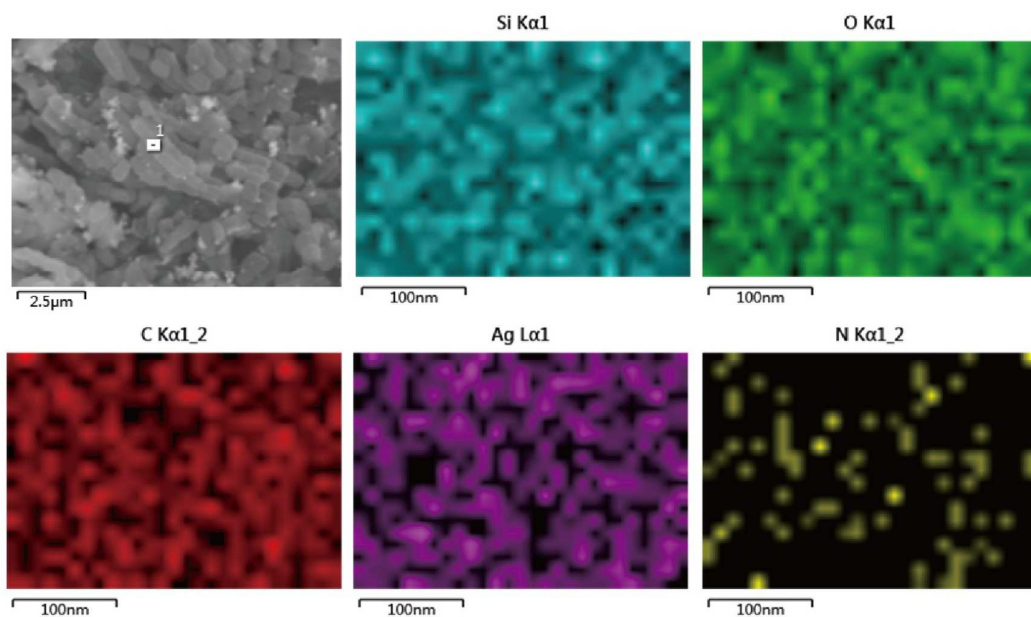

**Figure S1.** EDS mapping results of silicon (Si), oxygen (O), carbon (C), silver (Ag), and nitrogen (N) in SBA-15/PDA/Ag nanocomposites.

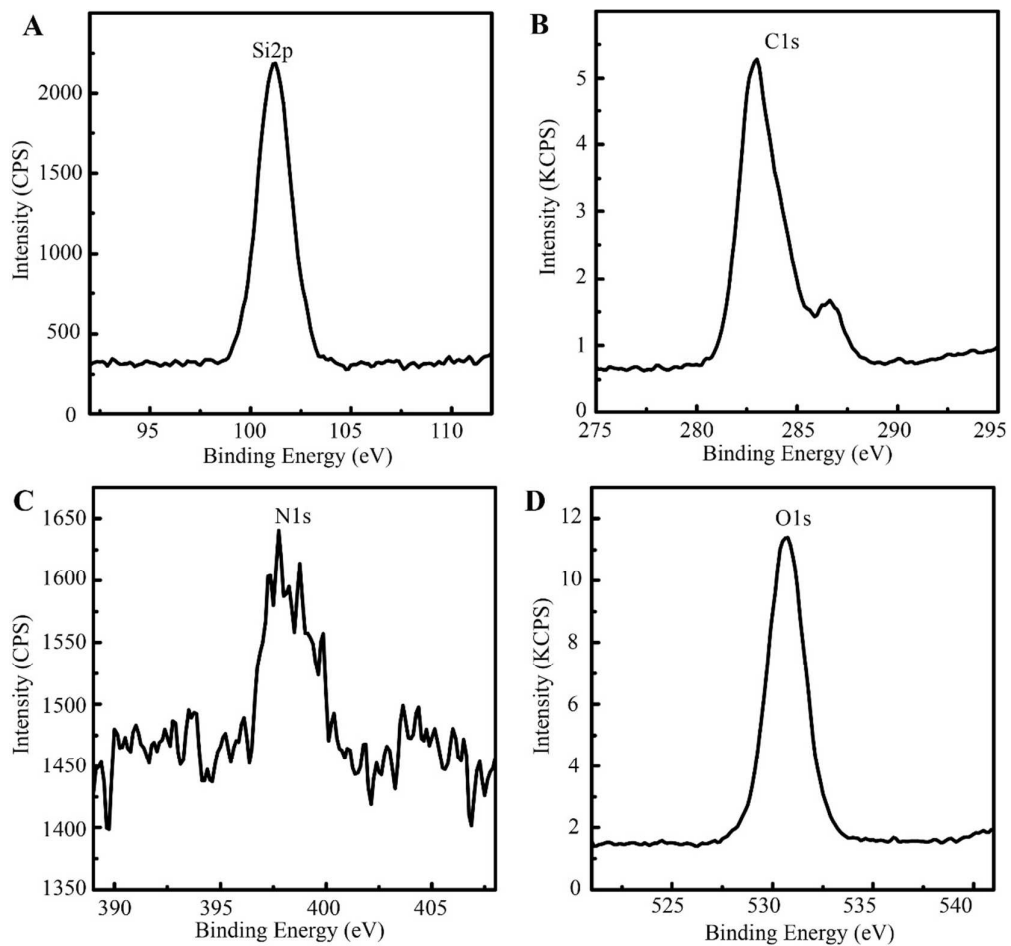

**Figure S2.** (A) Si 2p, (B) C 1s, (C) N 1s and (D) O 1s high resolution XPS spectra of SBA-15/PDA/Ag nanocomposites.

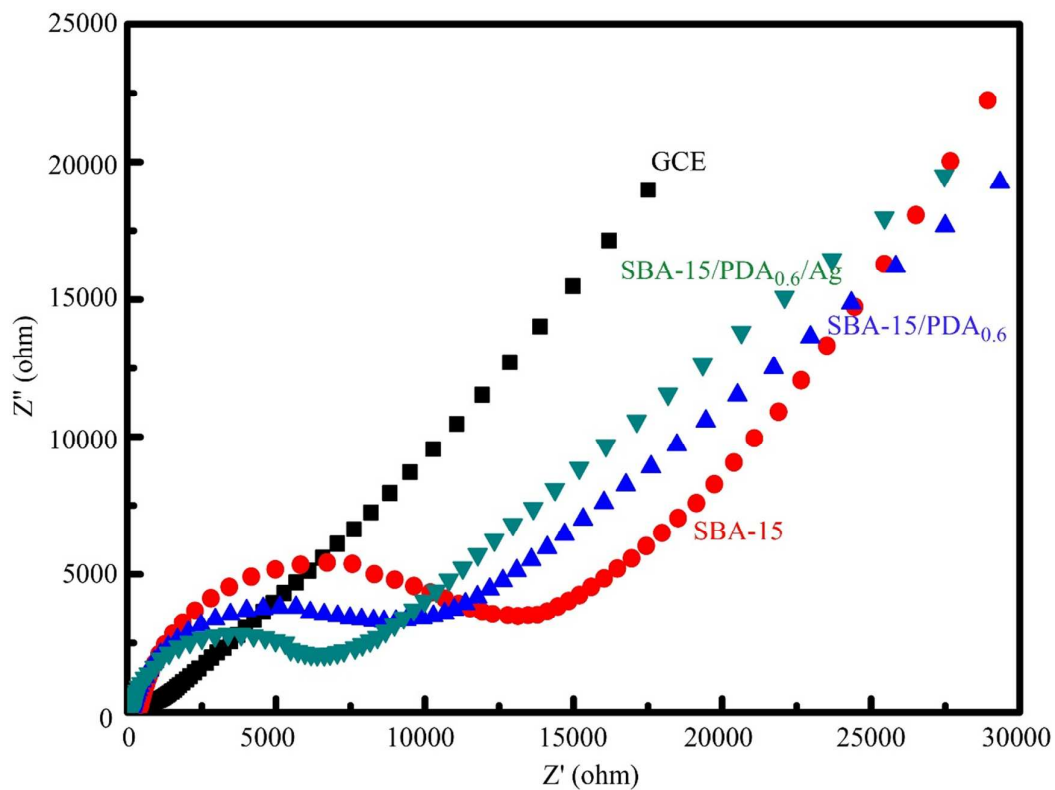

**Figure S3.** EIS of bare GCE, SBA-15 modified GCE, SBA-15/PDA<sub>0.6</sub> modified GCE and SBA-15/PDA<sub>0.6</sub>/Ag modified GCE in 10 mM KCl electrolyte solution containing 1 mM Fe(CN)<sub>6</sub><sup>3-/4-</sup>.

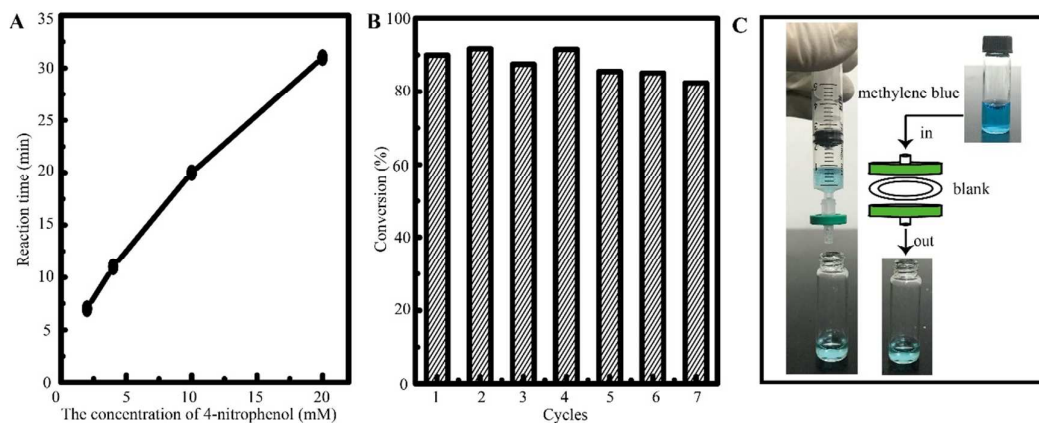

**Figure S4.** (A) The reaction time *versus* the concentration of 4-nitrophenol in the presence of 1 M NaBH<sub>4</sub> and 0.01 mg/mL SBA-15/PDA<sub>0.6</sub>/Ag; (B) Reusability of the SBA-15/PDA<sub>0.6</sub>/Ag under the experimental conditions of 1 M NaBH<sub>4</sub>, 2 mM 4-nitrophenol, and 0.01 mg/mL SBA-15/PDA<sub>0.6</sub>/Ag; (C) Photograph and illustration of the continuous flow catalysis of methylene blue using untreated commercial filter membrane in the presence of NaBH<sub>4</sub>.
